# Supplementary material
Source: PubMed Central journal article supplement (PMC3811546)
Supplement: AEM.02587-13_zam999104874so1.pdf [file AEM.02587-13_zam999104874so1.pdf]

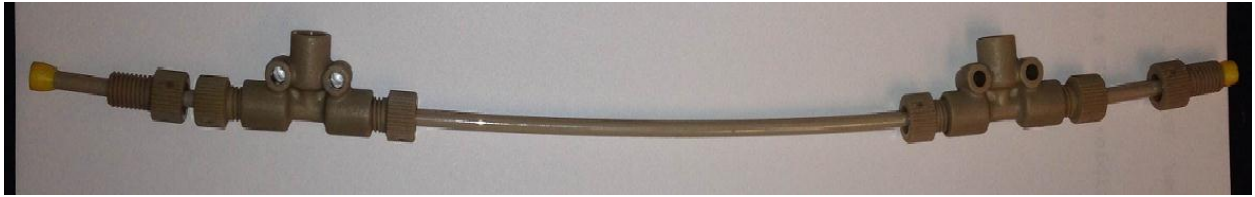

**FIG S1** The hollow fiber membrane module

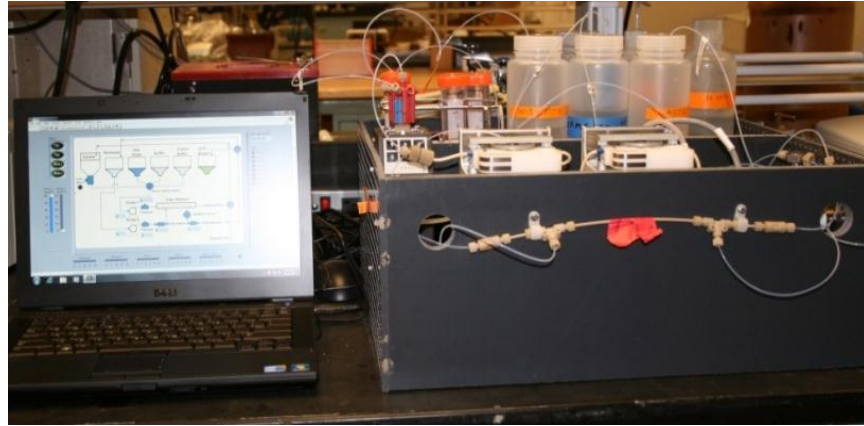

**FIG S2** The Cell Concentration Instrument and the control interface in a laboratory PC
